# Supplementary material for: Long term outcomes among patients with pre-existing psoriasis undergoing immune checkpoint inhibitor therapy: a case series and literature review
Source: Research Square preprint supplement (doi:10.21203/rs.3.rs-6658189/v1), 2025-06-02

SUPPLEMENTAL DATA

Figure 1. Graph of Kaplan Meier survival analysis on immune checkpoint inhibitor (ICI) therapy in patients with pre-existing psoriasis who experienced worsening disease on ICIs versus those with unaffected disease.


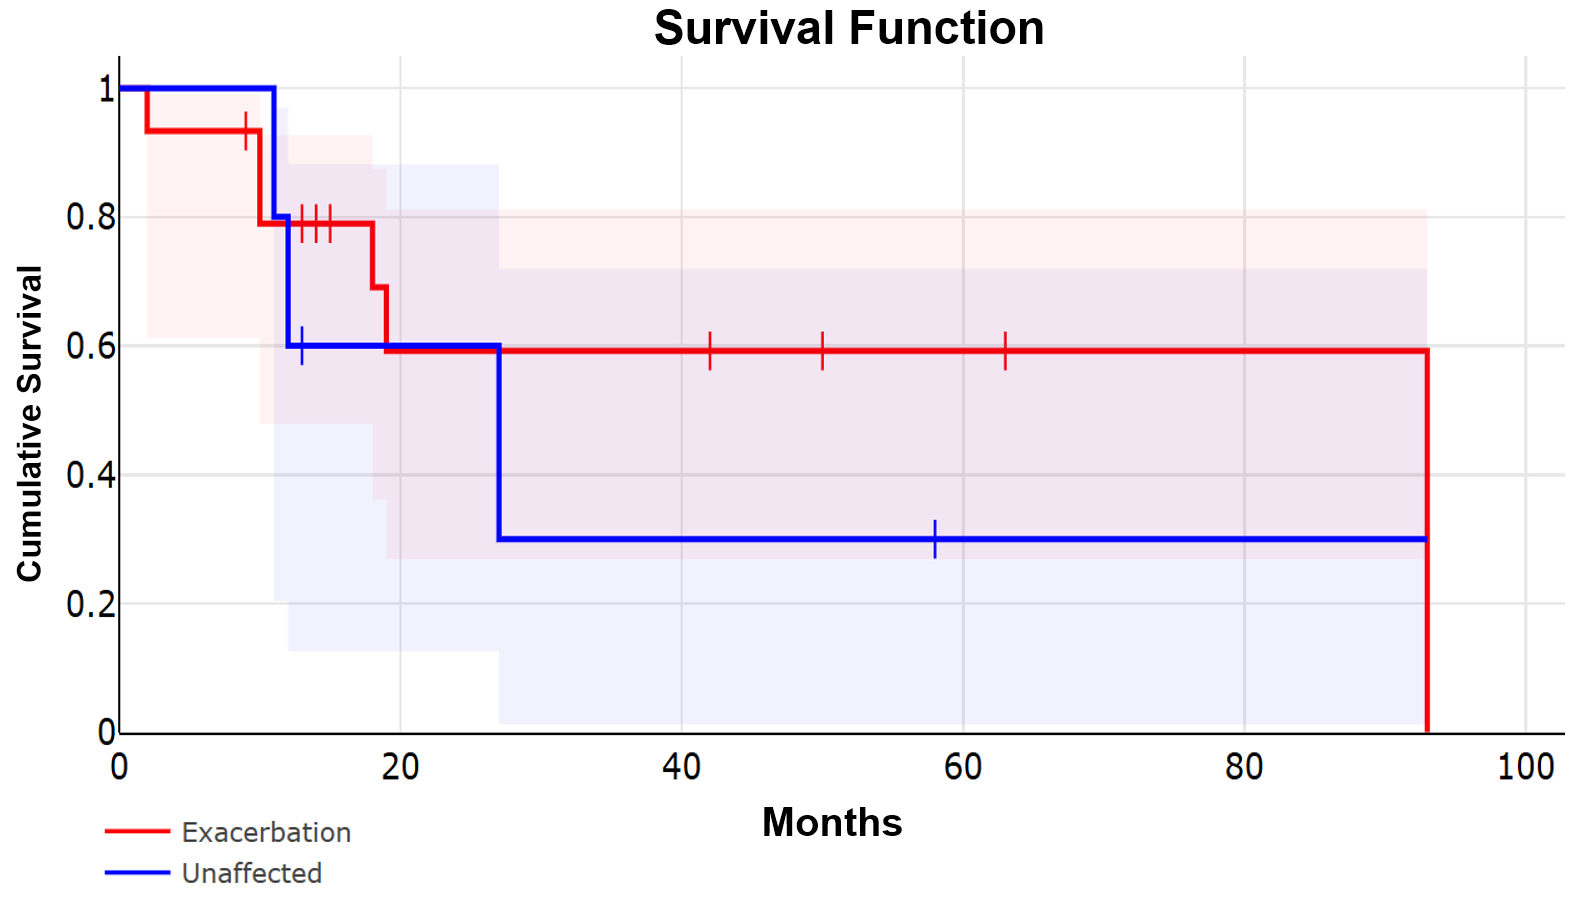


Figure 2. Graph of Kaplan Meier cancer progression free survival on immune checkpoint inhibitor (ICI) therapy in patients with pre-existing psoriasis who experienced worsening disease on ICIs versus those with unaffected disease.


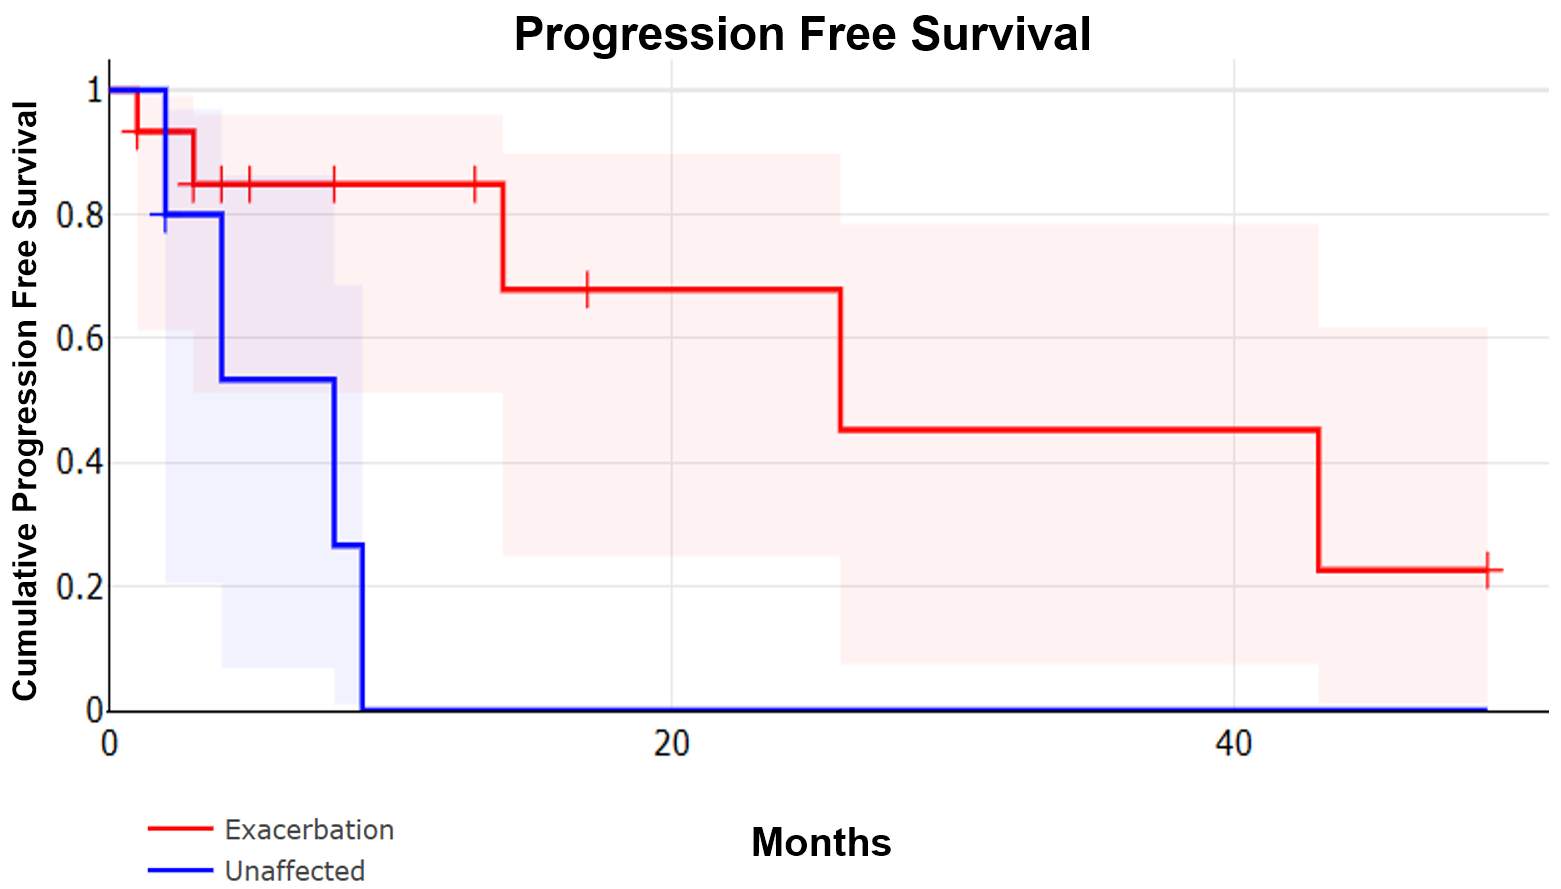

Supplement: Supplementary file 1 [file f3264c17d605a7efe1b9d948.docx]
